# Supplementary material for: Tomato Prosystemin Is Much More than a Simple Systemin Precursor
Source: MDPI journal article supplement (doi:10.3390/biology11010124), 2022-01-13
Supplement: s1 [file s1]

**Table S2.** Weight increase of *S. littoralis* larvae fed on leaves of ProSys<sub>(1-178)</sub> transgenic plants. The leaves employed were taken from control plants (C) and from two transgenic plant lines: ProSys<sub>(1-178)</sub> line 1 and 2, respectively. Average values  $\pm$  standard deviations are reported for each sample for all experimental time points analyzed. For each time point, mean values denoted with different letters are significantly different (\*One-way ANOVA:  $P < 0.0001$  followed by Tukey's post-hoc multiple-comparison test).

| Days of feeding | C<br>Larval weight (g)                  | ProSys <sub>(1-178)</sub> line 1<br>Larval weight (g) | ProSys <sub>(1-178)</sub> line 2<br>Larval weight (g) | F                  | P value  |
|-----------------|-----------------------------------------|-------------------------------------------------------|-------------------------------------------------------|--------------------|----------|
| 1               | <b>0.0047</b> $\pm$ 0.0007 <sup>a</sup> | <b>0.0046</b> $\pm$ 0.0006 <sup>a</sup>               | <b>0.0046</b> $\pm$ 0.0007 <sup>a</sup>               | F (3, 124) = 1.584 | 0.1966   |
| 5               | <b>0.0144</b> $\pm$ 0.0037 <sup>a</sup> | 0.0131 $\pm$ 0.0027 <sup>a</sup>                      | <b>0.0101</b> $\pm$ 0.0016 <sup>b</sup>               | F (3, 115) = 21.96 | 0.0001 * |
| 10              | <b>0.0226</b> $\pm$ 0.0091 <sup>a</sup> | <b>0.01642</b> $\pm$ 0.0054 <sup>b</sup>              | <b>0.0159</b> $\pm$ 0.0039 <sup>b</sup>               | F (3, 109) = 9.184 | 0.0001 * |
| 15              | <b>0.0964</b> $\pm$ 0.0341 <sup>a</sup> | <b>0.0266</b> $\pm$ 0.009 <sup>b</sup>                | <b>0.0336</b> $\pm$ 0.036 <sup>b</sup>                | F (3, 108) = 98.39 | 0.0001 * |
| 20              | <b>0.2763</b> $\pm$ 0.0913 <sup>a</sup> | <b>0.0545</b> $\pm$ 0.0134 <sup>b</sup>               | <b>0.0455</b> $\pm$ 0.0195 <sup>b</sup>               | F (3, 98) = 144.1  | 0.0001 * |
| 25              | <b>0.9309</b> $\pm$ 0.0155 <sup>a</sup> | <b>0.08124</b> $\pm$ 0.0256 <sup>b</sup>              | <b>0.0746</b> $\pm$ 0.0253 <sup>b</sup>               | F (3, 91) = 2242   | 0.0001 * |
