# Supplementary material for: Tomato Prosystemin Is Much More than a Simple Systemin Precursor
Source: MDPI journal article supplement (doi:10.3390/biology11010124), 2022-01-13
Supplement: s1 [file s1]

**Table S3.** Weight increase of *S. littoralis* larvae fed on leaves of tomato plants treated with ProSys<sub>(1-178)</sub> recombinant protein. Averages  $\pm$  standard deviations are reported for ProSys<sub>(1-178)</sub>-treated and control (C) samples for all experimental time points. (Student's t-test: \*  $P < 0.01$ ; \*\*  $P < 0.0001$ ).

| Days of feeding | C<br>Larval weight<br>(g)     | ProSys <sub>(1-178)</sub><br>Larval weight<br>(g) | t      | dF | Pvalue    |
|-----------------|-------------------------------|---------------------------------------------------|--------|----|-----------|
| 1               | <b>0.0039</b> $\pm$<br>0.0005 | <b>0.0039</b> $\pm$<br>0.0006                     | 0.3865 | 62 | 0.7005    |
| 3               | <b>0.0082</b> $\pm$<br>0.0026 | <b>0.0048</b> $\pm$<br>0.0015                     | 6.373  | 62 | 0.0001 ** |
| 5               | <b>0.0156</b> $\pm$<br>0.0044 | <b>0.0096</b> $\pm$<br>0.0168                     | 2.929  | 60 | 0.0599    |
| 7               | <b>0.0192</b> $\pm$<br>0.0089 | <b>0.0084</b> $\pm$<br>0.0029                     | 5.918  | 56 | 0.0001 ** |
| 10              | <b>0.0321</b> $\pm$<br>0.0083 | <b>0.0173</b> $\pm$<br>0.0082                     | 6.148  | 48 | 0.0001 ** |
| 12              | <b>0.0556</b> $\pm$<br>0.0121 | <b>0.0143</b> $\pm$<br>0.0067                     | 11.87  | 42 | 0.0001 ** |
| 14              | <b>0.0849</b> $\pm$<br>0.0321 | <b>0.0455</b> $\pm$<br>0.0587                     | 2.926  | 28 | 0.0067*   |
