# Supplementary material for: Tomato Prosystemin Is Much More than a Simple Systemin Precursor
Source: MDPI journal article supplement (doi:10.3390/biology11010124), 2022-01-13
Supplement: s1 [file s1]

**Table S1.** Primer and their main features. Table reports primer name, sequence, amplicon length, name/gene symbol and identifier (ITAG annotation) used in the experimental procedures.

| Primer      | Sequence (5'→3')                                    | Amplicon length (bp) | Name/Gene symbol               | Accession Number   |
|-------------|-----------------------------------------------------|----------------------|--------------------------------|--------------------|
| P11F1 Rw    | CGCGCGCCATGGGAACCTTCATATGATATCA                     |                      |                                |                    |
| Del Rv      | CGCGCGCTCGAGTTACTAAAGATCTTCTCGTACTAT<br>AATTTTCTCAC | 560                  | ProSys <sub>(1-178)</sub>      | AAA34184.1         |
| GST Fw      | AGATGAGACATTTGAAGGCCCT                              |                      |                                |                    |
| GST Rv      | TACCACCGCTCCACCTTAT                                 | 106                  | GST                            | Solyc09g011500.2.1 |
| EF Fw Rt    | CTCCATTGGGTCGTTTTGCT                                |                      |                                |                    |
| EF Rv Rt    | GGTCACCTTGGCACCAGTTG                                | 101                  | elongation Factor 1 alpha      | Solyc06g005060.2   |
| bZIP Fw     | CGGCGTGTGGAAGATGAGAT                                |                      |                                |                    |
| bZIP Rv     | CCTCAAGGGCCTCTGTCACTC                               | 145                  | bZIP                           | Solyc01g090270.2.1 |
| PPR2 Fw     | ATACCCAGAACGACCCGGTA                                |                      |                                |                    |
| PPR2 Rv     | CACCACCAGTCCCATTCTC                                 | 103                  | PPR2                           | Solyc01g110460.2.1 |
| MLO3 Fw     | CGGCACATTTAGCACACAG                                 |                      |                                |                    |
| MLO3 Rv     | GAGTAAGAAGAGCACGGCGA                                | 136                  | MLO3                           | Solyc06g010030.2.1 |
| Crocetin Fw | GGAGTACCTGTCGTGGCTTT                                |                      |                                |                    |
| Crocetin Rv | ACTCCACTCTTCCACACATCT                               | 83                   | Crocetin                       | Solyc12g098590.1.1 |
| SRP Fw      | CTTAGTGGACACAGCGAGCA                                |                      |                                |                    |
| SRP Rv      | GATCTCCATGCCAAAACCGC                                | 123                  | Stress-related protein         | Solyc09g074930.2.1 |
| DSP Fw      | TCATCAGCCTCATCACCTCC                                |                      |                                |                    |
| DSP Rv      | TGGAGTCAGACGGTGTGAA                                 | 148                  | Dual specificity phosphatase 1 | Solyc05g054700.2.1 |
| Lap Fw      | ATCTCAGGTTTCCTGGTGGAAGGA                            |                      |                                |                    |
| Lap Rv      | AGTTGCTATGGCAGAGGCAGAG                              | 99                   | leucine amino peptidase        | Solyc00g187050.2   |
| Mate Fw     | ACCCATCAATGACACCCAAG                                |                      |                                |                    |
| Mate Rv     | GGCATGTGGTATGGGATGTT                                | 154                  | mate efflux protein            | BI933305           |
| PG Fw       | TCAGCCCTTTTCCTTGTCGA                                | 125                  | Polygalacturonase              | Solyc08g082170.2.1 |
| PG Rv       | TGCGACCACCATCATTTCCA                                |                      |                                |                    |
| PcSys Fw    | TCTGAATTTGTCTCCCCTTAGAA                             |                      |                                |                    |
| PcSys Rv    | AGCCAAAAGAAAGGAAGCAATAC                             | 119                  | Endogenous Prosystemin         | Solyc05g051750.2.1 |
| Sys Fw      | GGGAGGGTGCACTAGAAATA                                |                      |                                |                    |
| Sys Rv      | TTGTCGAAACCGATGATACG                                | 108                  | ProSystemin                    | Solyc05g051750.2.1 |
| Sysdel Fw   | GAAGGAGATGATGATGCACAA                               |                      |                                |                    |
| Sysdel Rv   | CACCCTCCCCTTCCATCT                                  | 208                  | ProSystemin                    | Solyc05g051750.2.1 |
