# Supplementary material for: Tomato Prosystemin Is Much More than a Simple Systemin Precursor
Source: Biology (Basel). 2022 Jan 13;11(1):124. doi: 10.3390/biology11010124 (PMC8772835; doi:10.3390/biology11010124)
Supplement: Supplementary file 1 [file biology-11-00124-s001.zip › Table_S4_S5.xlsx]

## Sheet: UP-regulated genes
Table S4. Differentially expressed genes (DEGs) of ProSys(1-178) transgenic plants identified by microarray analysis (Tomato array 4x44K, Agilent Technologies). ProbeName, Locus ITAG2.5, Fold change, Best Blast Hit Descriptor for up-regulated genes are reported.
ProbeName	Locus ITAG2.5	Fold change	Best Blast Hit Descriptor
A_96_P131637	Solyc05g051750.2.1	90.5187	Prosystemin
A_96_P045676	Solyc08g082170.2.1	6.06585	Polygalacturonase
A_96_P098944	Solyc07g007320.1.1	5.54609	Zinc-binding family protein
A_96_P132642	Solyc08g082170.2.1	5.23679	Polygalacturonase
A_96_P046471	Solyc09g074930.2.1	5.22656	Stress-related protein
A_96_P247817	Solyc12g098590.1.1	4.16636	Crocetin chloroplastic-like
A_96_P207074	Solyc01g068480.2.1	4.03412	intron-binding protein aquarius
A_96_P032546	Solyc04g081570.2.1	3.95381	Chaperone protein htpG
A_96_P158131	Solyc12g038800.1.1	3.8642	Ethylene-responsive transcription factor crf2-like
A_96_P090559	Solyc09g061430.2.1	3.8356	Nucleolar GTP-binding protein 2
A_96_P243519	Solyc11g066580.1.1	3.80356	Cytochrome P450
A_96_P232794	Solyc12g098590.1.1	3.78591	Crocetin chloroplastic-like
A_96_P179959	Solyc09g064800.1.1	3.67937	Isoamylase chloroplastic
A_96_P242784	Solyc08g083300.2.1	3.66854	Ubiquitin carboxyl-terminal hydrolase
A_96_P213959	Solyc02g085020.2.1	3.66489	Dihydroflavonol 4-reductase
A_96_P121587	Solyc09g011500.2.1	3.61607	Glutathione s-transferase
A_96_P203744	Solyc05g005130.1.1	3.57301	Late blight resistance protein homolog
A_96_P178879	Solyc01g104590.2.1	3.55882	Ribosomal protein L3
A_96_P167729	Solyc01g104590.2.1	3.52652	Ribosomal protein L3
A_96_P176544	Solyc01g104590.2.1	3.51482	Ribosomal protein L3
A_96_P166999	Solyc06g065540.2.1	3.47602	Phosphatidylinositol-4-phosphate 5-kinase family protein
A_96_P232119	Solyc01g104990.2.1	3.43961	Trimethylguanosine synthase
A_96_P175389	Solyc06g009520.2.1	3.40719	Pentatricopeptide repeat-containing protein chloroplastic
A_96_P091634	Solyc04g081570.2.1	3.26127	Chaperone protein htpG
A_96_P134977	Solyc06g075560.1.1	3.25045	Glycosyltransferase-like protein
A_96_P159381	Solyc08g076370.2.1	3.2476	Homeobox-leucine zipper protein roc3
A_96_P241974	Solyc01g091190.2.1	3.22297	3-phosphoshikimate 1-carboxyvinyltransferase 2
A_96_P130962	Solyc12g055720.1.1	3.2085	Receptor like kinase
A_96_P190279	Solyc10g081510.1.1	3.20415	5-methyltetrahydropteroyltriglutamate--homocysteine methyltransferase
A_96_P029806	Solyc09g007540.2.1	3.20018	Valyl-tRNA synthetase
A_96_P231514	Solyc08g077210.2.1	3.1971	Inositol 1 4 5-trisphosphate 5-phosphatase
A_96_P158061	Solyc04g082430.2.1	3.18789	B-like cyclin
A_96_P028676	Solyc11g066560.1.1	3.1776	Vacuolar protein sorting-associated protein 41 homolog
A_96_P012586	Solyc02g085020.2.1	3.15317	Dihydroflavonol 4-reductase
A_96_P012776	Solyc05g054700.2.1	3.14354	Dual specificity phosphatase 1
A_96_P162141	Solyc07g052480.2.1	3.12594	Isocitrate lyase
A_96_P186969	Solyc09g064240.2.1	3.11631	Kinase pfkB family protein
A_96_P207814	Solyc12g009230.1.1	3.10772	oligouridylate-binding protein 1-like
A_96_P065681	Solyc02g067990.2.1	3.08854	Unknown protein
A_96_P107369	Solyc01g007640.2.1	3.03116	Ycf2
A_96_P115182	Solyc12g009840.1.1	2.96591	Pyrophosphate-energized vacuolar membrane proton pump-like
A_96_P170679	Solyc04g071660.2.1	2.91702	Unknown protein
A_96_P207019	Solyc10g081510.1.1	2.91361	5-methyltetrahydropteroyltriglutamate--homocysteine methyltransferase
A_96_P240220	Solyc02g071860.2.1	2.88637	Receptor like kinase
A_96_P063166	Solyc11g072530.1.1	2.88141	V-type proton ATPase subunit A
A_96_P213364	Solyc01g104070.2.1	2.87069	Importin beta
A_96_P013886	Solyc01g095180.2.1	2.86693	RING finger protein 38
A_96_P249632	Solyc01g102310.2.1	2.86217	Unknown protein
A_96_P164071	Solyc03g116380.2.1	2.85802	WD-40 repeat protein
A_96_P022261	Solyc09g089790.2.1	2.83282	1-aminocyclopropane-1-carboxylate oxidase-like protein
A_96_P262622	Solyc10g081510.1.1	2.809	5-methyltetrahydropteroyltriglutamate--homocysteine methyltransferase
A_96_P008016	Solyc01g005490.2.1	2.80335	Iaa-amino acid hydrolase 4
A_96_P145891	Solyc02g021420.2.1	2.80233	villin-4
A_96_P217464	Solyc01g104590.2.1	2.77739	Ribosomal protein L3
A_96_P237367	Solyc10g007950.2.1	2.77004	probable -trehalose-phosphate synthase
A_96_P068106	Solyc07g017760.1.1	2.76547	Pentatricopeptide repeat-containing protein
A_96_P150378	Solyc02g081680.2.1	2.75346	Nucleolar complex protein 2 homolog
A_96_P202909	Solyc04g025300.2.1	2.74414	Protein suppressor of gene silencing 3
A_96_P064256	Solyc10g074540.1.1	2.738	Unknown protein
A_96_P158951	Solyc08g068000.1.1	2.72391	Potassium channel kat3
A_96_P138222	Solyc09g064590.2.1	2.72186	Pre-mrna-processing factor 39
A_96_P129572	Solyc04g081570.2.1	2.7196	Chaperone protein htpG
A_96_P068261	Solyc09g064590.2.1	2.71611	Pre-mRNA-processing factor 39
A_96_P196029	Solyc04g074390.2.1	2.71227	UDP-glucuronosyltransferase
A_96_P014496	Solyc03g025190.2.1	2.71159	Protein transparent testa 12-like
A_96_P035841	Solyc01g080810.2.1	2.71158	Isoleucyl-trna synthetase
A_96_P124327	Solyc01g079320.2.1	2.70574	Pentatricopeptide repeat-containing protein
A_96_P211029	Solyc05g010100.2.1	2.70458	tRNA-adenosine deaminase
A_96_P010606	Solyc01g088370.2.1	2.70286	Eukaryotic translation initiation factor 3 subunit b-like
A_96_P023911	Solyc07g043560.2.1	2.67565	Heat shock protein 4
A_96_P242899	Solyc07g007690.2.1	2.66443	Chloride channel-like protein clc-g
A_96_P113922	Solyc10g006870.1.1	2.66234	Receptor-like protein kinase theseus 1
A_96_P204969	Solyc05g014250.2.1	2.66119	Ring finger protein 141
A_96_P126417	Solyc02g070780.2.1	2.64904	DNA replication licensing factor MCM3
A_96_P045231	Solyc06g011450.1.1	2.64632	clathrin assembly protein
A_96_P085304	Solyc02g068530.2.1	2.6434	UDP-N-acetylglucosamine pyrophosphorylase
A_96_P048401	Solyc07g052600.2.1	2.64268	Unknown protein
A_96_P072829	Solyc01g104590.2.1	2.63721	Ribosomal protein L3
A_96_P028191	Solyc11g066560.1.1	2.63523	Vacuolar protein sorting-associated protein 41
A_96_P097639	Solyc03g118020.2.1	2.63025	Tudor / nuclease domain-containing protein
A_96_P142117	Solyc05g047670.1.1	2.62949	Ycf2
A_96_P068876	Solyc03g082870.2.1	2.60935	WD-40 repeat protein
A_96_P070639	Solyc09g008610.2.1	2.60705	er membrane protein complex subunit 1-like
A_96_P201724	Solyc12g099840.1.1	2.59961	Pentatricopeptide repeat-containing protein mitochondrial
A_96_P169499	Solyc03g111120.2.1	2.59307	Malate synthase
A_96_P221029	Solyc07g005810.2.1	2.59162	Eukaryotic translation initiation factor isoform 4
A_96_P210089	Solyc04g051670.2.1	2.58358	N-acetyltransferase 10
A_96_P001437	Solyc01g104590.2.1	2.57646	Ribosomal protein L3
A_96_P166299	Solyc02g081940.2.1	2.57623	RNA binding protein
A_96_P240082	Solyc09g011690.2.1	2.57611	Unknown protein
A_96_P063571	Solyc12g099320.1.1	2.57486	Serine/threonine-protein phosphatase 4 regulatory subunit 3
A_96_P069779	Solyc12g038670.1.1	2.5729	Unknown protein
A_96_P100479	Solyc06g073550.2.1	2.56541	La-related protein 1a
A_96_P143436	Solyc02g078230.1.1	2.56053	Callose synthase 11
A_96_P051051	Solyc09g007540.2.1	2.55834	Valyl-tRNA synthetase
A_96_P068361	Solyc10g005530.2.1	2.5575	Nuclear cap-binding protein
A_96_P043831	Solyc08g005970.2.1	2.55298	Protein arginine N-methyltransferase
A_96_P185664	Solyc01g104590.2.1	2.55002	Ribosomal protein L3
A_96_P104304	Solyc10g083500.1.1	2.54448	Serine threonine-protein kinase
A_96_P136972	Solyc02g081340.2.1	2.54094	Glutathione S-transferase
A_96_P061571	Solyc12g008390.1.1	2.53939	Golgin candidate 1
A_96_P201474	Solyc05g056530.2.1	2.53449	DDT domain-containing protein
A_96_P114877	Solyc04g054480.2.1	2.53283	C2 domain-containing protein
A_96_P067961	Solyc09g098580.2.1	2.53255	GTP pyrophosphokinase
A_96_P083684	Solyc00g019740.1.1	2.53214	ATPase subunit 8
A_96_P052186	Solyc02g014310.2.1	2.53213	Polyadenylate-binding protein
A_96_P208359	Solyc07g047790.2.1	2.53083	Heat shock protein 83
A_96_P213679	Solyc01g104590.2.1	2.52911	Ribosomal protein L3
A_96_P126562	Solyc06g083760.2.1	2.52676	Histone-lysine n-methyltransferase
A_96_P203249	Solyc11g065260.1.1	2.52251	Chaperone protein dnaJ
A_96_P214559	Solyc05g053550.2.1	2.51195	Chalcone synthase
A_96_P182919	Solyc04g050510.2.1	2.51106	Translational activator gcn1
A_96_P060676	Solyc01g005690.2.1	2.51055	Calcium ion binding protein
A_96_P027626	Solyc11g012140.1.1	2.50492	Isoleucyl-tRNA synthetase
A_96_P047681	Solyc11g006340.1.1	2.49412	Phosphoribosylaminoimidazole carboxylase ATPase subunit
A_96_P159051	Solyc06g009970.2.1	2.49227	Elongation factor 1-alpha-like
A_96_P179064	Solyc01g107410.2.1	2.48931	PHD-finger family homeodomain protein
A_96_P176184	Solyc01g103450.2.1	2.48158	Chaperone DnaK
A_96_P163601	Solyc10g054860.1.1	2.47993	Unknown protein
A_96_P209054	Solyc08g067790.2.1	2.47988	Transcription elongation factor S-II
A_96_P084029	Solyc08g083300.2.1	2.47593	Ubiquitin carboxyl-terminal hydrolase 9-like
A_96_P228119	Solyc11g006180.1.1	2.47572	Ethylene receptor
A_96_P060216	Solyc09g082370.2.1	2.47276	Inositol 1 4 5-trisphosphate 5-phosphatase
A_96_P117472	Solyc09g030390.2.1	2.47211	Serine arginine repetitive matrix protein 1
A_96_P189564	Solyc08g080300.1.1	2.47083	Glucose transporter member 3
A_96_P218174	Solyc06g009210.2.1	2.46602	Ribosomal protein L3
A_96_P071369	Solyc06g074600.1.1	2.46447	DNA-directed RNA polymerase
A_96_P186159	Solyc09g061430.2.1	2.46338	Nucleolar GTP-binding protein 2
A_96_P072299	Solyc03g006280.2.1	2.46325	Unknown protein
A_96_P029656	Solyc01g090270.2.1	2.43553	bzip domain class transcription factor
A_96_P027151	Solyc03g111140.2.1	2.4315	Malate synthase
A_96_P166979	Solyc02g094590.2.1	2.42744	Transcription-repair coupling factor
A_96_P063621	Solyc02g081290.2.1	2.4266	ATP-dependent RNA helicase
A_96_P104144	Solyc02g071860.2.1	2.4223	LRR receptor-like serine threonine-protein kinase
A_96_P258017	Solyc02g092270.2.1	2.42083	NADH dehydrogenase
A_96_P119557	Solyc09g008610.2.1	2.41545	ER membrane protein complex subunit 1
A_96_P194514	Solyc03g116610.2.1	2.41327	Ethylene-responsive transcription factor win1
A_96_P218584	Solyc01g099970.2.1	2.41238	F-box/LRR-repeat protein 14
A_96_P033591	Solyc07g053440.2.1	2.40325	Unknown protein
A_96_P144886	Solyc01g094330.2.1	2.39871	Unknown protein
A_96_P068536	Solyc03g083900.2.1	2.3966	Laccase-22
A_96_P211239	Solyc11g012160.1.1	2.39375	Fumarylacetoacetase family protein
A_96_P047786	Solyc03g063390.1.1	2.39231	Mitochondrial transcription termination factor family isoform 1
A_96_P185169	Solyc05g015050.2.1	2.39168	Unknown protein
A_96_P210680	Solyc03g005600.2.1	2.39163	Dehydration-responsive protein
A_96_P193009	Solyc11g069270.1.1	2.39146	Beta-galactosidase 8
A_96_P140397	Solyc08g081010.2.1	2.38726	Glutamate-cysteine ligase
A_96_P028846	Solyc08g067790.2.1	2.38145	Transcription elongation factor S-II
A_96_P119532	Solyc02g069570.2.1	2.38115	Pentatricopeptide repeat-containing protein chloroplastic
A_96_P165691	Solyc12g096590.1.1	2.37581	dimethyl-8-ribityllumazine chloroplastic protein
A_96_P194784	Solyc04g025300.2.1	2.37451	Protein suppressor of gene silencing 3-like
A_96_P048686	Solyc06g073330.2.1	2.36962	Lysyl-tRNA synthetase
A_96_P036051	Solyc06g075160.2.1	2.36644	Serine/threonine-protein phosphatase 6 regulatory subunit 3
A_96_P256047	Solyc09g098150.2.1	2.36194	Metacaspase 7
A_96_P068151	Solyc07g005810.2.1	2.36107	Eukaryotic translation initiation factor 4
A_96_P039006	Solyc07g008670.2.1	2.35262	Unknown protein
A_96_P100199	Solyc03g115050.2.1	2.35242	Single-stranded DNA-binding replication protein A large subunit
A_96_P096919	Solyc07g052830.2.1	2.34918	Storekeeper protein
A_96_P246432	Solyc01g005210.2.1	2.34481	Trehalose-phosphate synthase
A_96_P207344	Solyc02g064680.2.1	2.34465	Calcium-transporting atpase 1
A_96_P232824	Solyc01g005080.2.1	2.34221	Microtubule-associated protein MAP65-1a
A_96_P140277	Solyc02g089070.2.1	2.33762	Eukaryotic translation initiation factor 3
A_96_P026731	Solyc12g043110.1.1	2.3375	Heat shock protein 70
A_96_P220919	Solyc05g056140.2.1	2.33586	Inter-alpha-trypsin inhibitor heavy chain H3
A_96_P227554	Solyc03g111120.2.1	2.33525	Malate synthase
A_96_P127042	Solyc04g017700.2.1	2.33506	N-acetylglucosaminyl transferase component Gpi1
A_96_P221514	Solyc07g018360.2.1	2.33095	Elongation factor Ts
A_96_P262067	Solyc04g051670.2.1	2.32974	N-acetyltransferase 10
A_96_P249487	Solyc09g010690.2.1	2.32653	Ankyrin repeat domain-containing protein 28
A_96_P144751	Solyc05g013400.2.1	2.32638	Pentatricopeptide repeat-containing protein mitochondrial
A_96_P202414	Solyc01g110460.2.1	2.32202	Polyprenol reductase 2
A_96_P079909	Solyc11g051160.1.1	2.3183	Patellin-3-like
A_96_P037566	Solyc09g005910.2.1	2.31626	Phosphatidate phosphatase pah1
A_96_P205129	Solyc05g054630.2.1	2.31484	Elongator complex protein 1
A_96_P194714	Solyc06g048470.2.1	2.31454	COP1-Interacting ProteinI 7 (CIP7)
A_96_P240453	Solyc12g056580.1.1	2.31349	Cellulose synthase
A_96_P047481	Solyc02g088330.2.1	2.31238	Serine threonine-protein kinase
A_96_P205834	Solyc05g015610.2.1	2.30434	Histidine kinase 3
A_96_P180889	Solyc07g005880.2.1	2.30354	Replication factor c subunit 1
A_96_P124462	Solyc01g095740.2.1	2.30249	ATP-dependent RNA helicase DBP4
A_96_P066261	Solyc03g120350.2.1	2.29999	N-alpha-acetyltransferase auxiliary subunit
A_96_P105194	Solyc09g008040.2.1	2.29653	rna polymerase sigma factor chloroplastic isoform x1
A_96_P125712	Solyc08g077690.2.1	2.29188	Chromodomain helicase DNA binding protein 5
A_96_P079369	Solyc05g023740.2.1	2.29174	Protein mei2-like 4
A_96_P004171	Solyc02g070860.2.1	2.29157	Tobamovirus multiplication protein 1
A_96_P062926	Solyc03g114370.2.1	2.29096	Atp-dependent RNA helicase
A_96_P054246	Solyc08g005860.2.1	2.29076	Putrescine-binding periplasmic protein
A_96_P106644	Solyc08g079510.2.1	2.28759	Unknown protein
A_96_P190699	Solyc01g090270.2.1	2.2842	bzip domain class transcription factor
A_96_P145281	Solyc05g051390.2.1	2.2838	Kinase interacting protein 1
A_96_P258647	Solyc10g051020.1.1	2.28231	Cytochrome p450
A_96_P070794	Solyc10g076990.1.1	2.28018	Arf-GAP domain and FG repeats-containing protein 1
A_96_P206379	Solyc02g081910.1.1	2.27786	DNA topoisomerase
A_96_P222819	Solyc01g095300.2.1	2.27113	Glycosyl transferase family 1 protein
A_96_P119862	Solyc06g083760.2.1	2.27096	Histone-lysine n-methyltransferase
A_96_P036441	Solyc08g066130.1.1	2.26972	Unknown protein
A_96_P231714	Solyc02g094100.2.1	2.26556	Katanin p60 ATPase-containing subunit
A_96_P096039	Solyc02g079040.2.1	2.26502	Calmodulin-binding protein
A_96_P206314	Solyc04g071660.2.1	2.26449	Unknown protein
A_96_P242194	Solyc01g008310.2.1	2.26375	Phenylalanyl-tRNA synthetase beta chain
A_96_P123157	Solyc07g017760.1.1	2.25929	Pentatricopeptide repeat-containing protein chloroplastic
A_96_P251787	Solyc08g081580.2.1	2.25632	Pin2-interacting protein X1
A_96_P163231	Solyc01g068330.2.1	2.25523	Cell division control protein 48
A_96_P168229	Solyc03g071550.1.1	2.2537	Chromodomain helicase DNA binding protein 3
A_96_P077769	Solyc02g092460.2.1	2.2536	Speckle-type POZ protein
A_96_P228139	Solyc06g069870.2.1	2.25276	Dehydration-responsive family protein
A_96_P052386	Solyc05g005800.2.1	2.2518	threonine--trna mitochondrial-like
A_96_P061286	Solyc06g053530.2.1	2.24863	Calmodulin-binding protein MPCBP
A_96_P210019	Solyc01g097760.2.1	2.24613	Ribosomal protein L7a
A_96_P158856	Solyc07g008340.2.1	2.24492	ABC transporter e family member 2
A_96_P090094	Solyc08g062920.2.1	2.24263	Elongation factor 2
A_96_P040571	Solyc04g082130.2.1	2.23858	tRNA pseudouridine synthase pus10
A_96_P228144	Solyc01g099180.2.1	2.23791	Lipoxygenase
A_96_P182759	Solyc06g009780.2.1	2.23648	Kinesin
A_96_P164826	Solyc11g012570.1.1	2.23406	Pentatricopeptide repeat protein
A_96_P068171	Solyc01g103450.2.1	2.23219	Chaperone DnaK
A_96_P033801	Solyc10g080290.1.1	2.23084	Unknown protein
A_96_P102774	Solyc11g072590.1.1	2.23045	CCR4-NOT transcription complex subunit 4
A_96_P109602	Solyc04g049120.2.1	2.23023	Nuclear receptor corepressor 2
A_96_P166289	Solyc10g084650.1.1	2.22392	Chromodomain-helicase-dna-binding protein 4
A_96_P031201	Solyc11g056580.1.1	2.22242	Unknown protein
A_96_P179759	Solyc04g071650.2.1	2.22169	Cellulose synthase
A_96_P203034	Solyc07g007890.2.1	2.22066	ccr4-not transcription complex subunit 10
A_96_P211289	Solyc03g095250.2.1	2.2204	Unknown protein
A_96_P184554	Solyc01g009090.2.1	2.21492	Serrate RNA effector molecule
A_96_P014751	Solyc02g091920.2.1	2.21143	Xyloglucan endotransglucosylase hydrolase
A_96_P230179	Solyc10g047350.1.1	2.20855	Lysine-specific histone demethylase 1
A_96_P101234	Solyc07g040990.2.1	2.20741	Protein phosphatase 2c
A_96_P064706	Solyc01g099280.2.1	2.20618	AMP-activated protein kinase gamma-1 subunit
A_96_P028601	Solyc09g008610.2.1	2.20221	ER membrane protein complex subunit 1
A_96_P234159	Solyc03g113380.2.1	2.20113	Pentatricopeptide repeat-containing protein
A_96_P084734	Solyc07g006030.2.1	2.20102	Tetratricopeptide repeat protein isoform 1
A_96_P027421	Solyc04g011650.2.1	2.19955	Telomere repeat-binding protein 4
A_96_P159706	Solyc03g114300.2.1	2.19954	4-hydroxybenzoate octaprenyltransferase mitochondrial
A_96_P243459	Solyc01g110120.2.1	2.19927	V-type proton ATPase subunit a
A_96_P258512	Solyc02g086470.2.1	2.19743	WD repeat protein
A_96_P102104	Solyc04g049070.2.1	2.19731	Alpha glucosidase II
A_96_P244645	Solyc07g044820.1.1	2.19573	beta- -galactosyltransferase pvg3
A_96_P206799	Solyc09g074940.1.1	2.19498	Translocase of chloroplast chloroplastic
A_96_P115792	Solyc01g095300.2.1	2.19021	Glycosyl transferase family 1 protein isoform 1
A_96_P222799	Solyc06g068860.2.1	2.19016	Alpha-mannosidase
A_96_P058971	Solyc05g053550.2.1	2.18915	Chalcone synthase
A_96_P188914	Solyc04g009990.2.1	2.18867	Lysine-specific demethylase 5A
A_96_P238502	Solyc06g059710.2.1	2.18822	Stearoyl-acyl carrier protein desaturase
A_96_P132087	Solyc08g077210.2.1	2.18762	Inositol 1 4 5-trisphosphate 5-phosphatase
A_96_P162666	Solyc05g055110.2.1	2.18759	Unknown protein
A_96_P028406	Solyc09g064470.2.1	2.18755	Galactosyltransferase-like protein
A_96_P159856	Solyc01g103450.2.1	2.18713	Chaperone DnaK
A_96_P213094	Solyc08g081010.2.1	2.1868	Glutamate-cysteine ligase
A_96_P081984	Solyc02g078120.1.1	2.18637	Eukaryotic translation initiation factor 3 subunit d
A_96_P222619	Solyc01g059860.2.1	2.18358	Serine threonine-protein kinase
A_96_P047251	Solyc04g015490.2.1	2.18198	Magnesium-chelatase subunit chloroplastic
A_96_P038711	Solyc01g091510.2.1	2.18192	Ankyrin repeat and zinc finger domain-containing protein 1
A_96_P232594	Solyc01g096550.2.1	2.18186	Arginine n-methyltransferase 3
A_96_P164466	Solyc12g088720.1.1	2.18122	Polyadenylate-binding protein 2
A_96_P180524	Solyc10g007500.2.1	2.17951	Mitogen-activated protein kinase 19
A_96_P170364	Solyc06g035720.2.1	2.17233	BCL-2 binding anthanogene-1
A_96_P228239	Solyc01g107200.2.1	2.17187	Unknown protein
A_96_P237807	Solyc08g028950.1.1	2.17153	DNA-directed RNA polymerase subunit beta
A_96_P028556	Solyc05g010810.1.1	2.16941	Phosphatidylinositol kinase
A_96_P091489	Solyc03g097050.2.1	2.16839	Cellulose synthase
A_96_P201469	Solyc12g095890.1.1	2.16718	Poly(A) polymerase
A_96_P211933	Solyc05g056230.2.1	2.16716	Calreticulin 2 calcium-binding protein
A_96_P041846	Solyc03g063560.2.1	2.16532	Glutamate synthase
A_96_P068146	Solyc12g006200.1.1	2.16217	Unknown protein
A_96_P129872	Solyc11g066560.1.1	2.16099	Vacuolar protein sorting-associated protein 41
A_96_P124082	Solyc01g080810.2.1	2.16012	Isoleucyl-tRNA synthetase
A_96_P066191	Solyc10g080160.1.1	2.1601	28s ribosomal protein mitochondrial
A_96_P256737	Solyc07g052720.2.1	2.15813	MADS-box transcription factor 50
A_96_P102584	Solyc04g072290.2.1	2.15639	Exocyst complex component sec6
A_96_P029231	Solyc05g009930.2.1	2.1547	Hydroxyproline-rich glycoprotein family protein
A_96_P240230	Solyc02g070580.1.1	2.15179	Sterol 22-desaturase
A_96_P088034	Solyc10g076640.1.1	2.15037	F-box/kelch-repeat protein
A_96_P061136	Solyc08g075840.2.1	2.14916	Single-stranded DNA-binding replication protein A large subunit
A_96_P069614	Solyc11g010110.1.1	2.14728	tRNA-methyltransferase-like
A_96_P241814	Solyc03g118290.2.1	2.14606	Auxin response factor 2
A_96_P053641	Solyc09g098290.2.1	2.14525	Receptor like kinase
A_96_P203329	Solyc09g074940.1.1	2.14237	Translocase of chloroplast chloroplastic
A_96_P001736	Solyc07g047670.2.1	2.14198	Pescadillo homolog 1
A_96_P028141	Solyc11g066840.1.1	2.13928	Histone deacetylase-like protein
A_96_P119647	Solyc02g071860.2.1	2.13855	LRR receptor-like serine threonine-protein kinase
A_96_P221099	Solyc07g043270.2.1	2.13771	Protein FAR1-RELATED SEQUENCE 4
A_96_P203144	Solyc08g067920.2.1	2.13734	Nucleic acid binding protein
A_96_P098224	Solyc07g018360.2.1	2.13551	Elongation factor Ts
A_96_P115802	Solyc02g070290.2.1	2.13543	Solute carrier family 12
A_96_P069176	Solyc01g102800.2.1	2.13422	Histidyl-tRNA synthetase
A_96_P091499	Solyc06g071100.2.1	2.13409	ATPase 1
A_96_P068141	Solyc04g081070.2.1	2.13395	Heat shock protein DnaJ domain protein
A_96_P162741	Solyc08g079060.2.1	2.13389	Trehalose 6-phosphate phosphatase
A_96_P258337	Solyc05g009930.2.1	2.13366	Hydroxyproline-rich glycoprotein family protein
A_96_P202394	Solyc03g033630.2.1	2.13237	Zinc finger ccch domain-containing protein 44
A_96_P222479	Solyc04g005270.1.1	2.13194	Phosphatidylinositol kinase
A_96_P061811	Solyc06g074440.2.1	2.13095	Unknown protein
A_96_P229354	Solyc07g062580.2.1	2.13076	DnaJ homolog subfamily C member 7
A_96_P038841	Solyc07g018360.2.1	2.1305	Elongation factor Ts
A_96_P070619	Solyc06g005080.2.1	2.13004	Vacuolar protein sorting-associated protein 18
A_96_P227969	Solyc08g061560.2.1	2.12462	LRR receptor serine threonine kinase erecta
A_96_P063756	Solyc04g082570.2.1	2.12424	U-box domain-containing protein
A_96_P104234	Solyc10g078910.1.1	2.1228	Unknown protein
A_96_P103154	Solyc09g091510.2.1	2.12223	Chalcone synthase
A_96_P131847	Solyc01g103760.2.1	2.12157	Magnesium transporter nipa4
A_96_P162186	Solyc07g052480.2.1	2.11987	Isocitrate lyase
A_96_P047641	Solyc03g113640.2.1	2.11956	Unknown protein
A_96_P101499	Solyc01g005080.2.1	2.11863	Microtubule-associated protein MAP65-1a
A_96_P084469	Solyc03g117630.1.1	2.11646	Heat shock protein 70
A_96_P182744	Solyc10g086010.1.1	2.11432	60s ribosomal protein L4/L1
A_96_P220834	Solyc08g044400.1.1	2.11338	Phosphoinositide phosphatase
A_96_P027376	Solyc04g076620.2.1	2.1129	Ubiquitin-protein ligase 1
A_96_P036106	Solyc07g006540.2.1	2.11241	Chaperone protein ClpB
A_96_P084739	Solyc11g066870.1.1	2.1115	Morn repeat-containing protein
A_96_P162086	Solyc11g072710.1.1	2.10842	Phototropin-1
A_96_P205059	Solyc06g073550.2.1	2.10683	LA-related protein 1a
A_96_P041761	Solyc01g106240.2.1	2.10566	DNA polymerase V
A_96_P116427	Solyc06g075640.1.1	2.10536	Male sterility 5 family protein
A_96_P256107	Solyc01g095740.2.1	2.10486	ATP-dependent RNA helicase DBP4
A_96_P069056	Solyc08g006310.2.1	2.10403	Xyloglucan glycosyltransferase 5
A_96_P142372	Solyc07g047820.1.1	2.10335	Pentatricopeptide repeat-containing protein
A_96_P169334	Solyc01g104300.2.1	2.10265	Unknown protein
A_96_P064622	Solyc11g066650.1.1	2.10009	Serine threonine-protein kinase srpk
A_96_P021426	Solyc08g079180.2.1	2.09955	Elongation factor G
A_96_P030016	Solyc03g082490.2.1	2.09922	Unknown protein
A_96_P250597	Solyc02g084390.2.1	2.09737	Kinesin protein nack1
A_96_P226874	Solyc09g011630.2.1	2.09706	Glutathione S-transferase
A_96_P221254	Solyc03g063560.2.1	2.09682	Ferredoxin-dependent glutamate synthase chloroplastic
A_96_P179649	Solyc07g062580.2.1	2.09639	DnaJ homolog subfamily C member 7
A_96_P182174	Solyc06g016840.1.1	2.09624	Mutator-like transposase
A_96_P232219	Solyc03g082860.2.1	2.09533	Histone-lysine n-methyltransferase
A_96_P048571	Solyc04g082330.2.1	2.09375	Pre-rRNA-processing protein TSR1
A_96_P221754	Solyc06g005190.2.1	2.09348	CCR4-NOT transcription complex subunit 4
A_96_P094794	Solyc07g055860.2.1	2.09262	Serine/threonine-protein phosphatase 5
A_96_P130562	Solyc07g056550.2.1	2.09226	Bystin
A_96_P126917	Solyc02g069770.2.1	2.09211	Guanine nucleotide-binding protein subunit beta
A_96_P203469	Solyc08g075000.2.1	2.09173	Unknown protein
A_96_P085364	Solyc01g067390.2.1	2.09155	Chromodomain-helicase-DNA-binding protein 2
A_96_P179669	Solyc04g051670.2.1	2.09123	N-acetyltransferase 10
A_96_P050416	Solyc07g041510.1.1	2.08981	SH2 domain binding protein
A_96_P220969	Solyc03g082940.2.1	2.08962	Importin subunit beta 1
A_96_P173834	Solyc01g096900.2.1	2.08903	DNA gyrase subunit A family protein
A_96_P069904	Solyc12g099090.1.1	2.08696	YTH domain family 2
A_96_P241614	Solyc09g018450.2.1	2.08628	Ubiquitin-activating enzyme E1
A_96_P065971	Solyc01g106740.2.1	2.08346	Aspartyl-tRNA synthetase
A_96_P101609	Solyc02g081590.2.1	2.08343	FACT complex subunit SPT16
A_96_P061961	Solyc07g063650.2.1	2.08122	Ubiquitin carboxyl-terminal hydrolase
A_96_P221914	Solyc07g017780.2.1	2.08065	Plasma membrane atpase 4
A_96_P256177	Solyc03g006770.2.1	2.08055	Serine/threonine kinase receptor
A_96_P164276	Solyc12g063050.1.1	2.08014	RNA polymerase II C-terminal domain phosphatase-like 3
A_96_P242344	Solyc12g021310.1.1	2.07978	WD repeat-containing protein 91
A_96_P103219	Solyc03g112450.2.1	2.07918	Signal recognition particle receptor subunit beta
A_96_P205804	Solyc02g071090.2.1	2.07739	Purine permease 10
A_96_P140262	Solyc08g062920.2.1	2.07535	Elongation factor EF-2
A_96_P042151	Solyc09g011690.2.1	2.06931	Unknown protein
A_96_P069864	Solyc04g015830.2.1	2.06674	Villin 2
A_96_P205504	Solyc03g120200.1.1	2.06565	Regulator of telomere elongation helicase 1
A_96_P164246	Solyc09g008040.2.1	2.06269	RNA polymerase sigma-70 factor
A_96_P122352	Solyc10g081610.1.1	2.06261	Ubiquitin carboxyl-terminal hydrolase 12
A_96_P253532	Solyc11g062410.1.1	2.06235	CBL-interacting protein kinase 18
A_96_P094859	Solyc10g081650.1.1	2.06109	Carotenoid isomerase
A_96_P051056	Solyc05g013670.2.1	2.06075	ATP binding protein
A_96_P159106	Solyc01g110360.2.1	2.05911	Fructose-bisphosphate aldolase chloroplastic
A_96_P179909	Solyc06g076640.2.1	2.05753	Tubulin beta chain
A_96_P213844	Solyc11g069090.1.1	2.05161	ABC transporter f family member 1
A_96_P036011	Solyc04g051800.2.1	2.05151	ABC transporter f family member 5
A_96_P081019	Solyc07g065120.2.1	2.05097	probable glycerophosphoryl diester phosphodiesterase 2
A_96_P052506	Solyc02g080470.2.1	2.05084	Heat shock protein 4
A_96_P159206	Solyc10g083690.2.1	2.0496	Cytochrome P450
A_96_P060416	Solyc03g119650.2.1	2.0496	WD-40 repeat protein
A_96_P233084	Solyc09g065180.2.1	2.04831	NAD-dependent epimerase/dehydratase
A_96_P253152	Solyc01g020240.2.1	2.04794	Unknown protein
A_96_P060496	Solyc11g066920.1.1	2.04772	Pentatricopeptide repeat-containing protein
A_96_P140357	Solyc05g006710.2.1	2.04766	Unknown protein
A_96_P036141	Solyc08g061100.2.1	2.04508	Cellulose synthase
A_96_P110407	Solyc12g038800.1.1	2.04487	Ethylene-responsive transcription factor crf2
A_96_P068501	Solyc10g018520.1.1	2.04404	Exosome component 10
A_96_P144826	Solyc08g080830.2.1	2.04389	LRR receptor serine threonine kinase
A_96_P206049	Solyc11g008740.1.1	2.04127	Double-strand-break repair protein rad21
A_96_P241524	Solyc03g117480.2.1	2.04074	Pyrophosphate-energized vacuolar membrane proton pump
A_96_P121737	Solyc04g074670.2.1	2.04069	Unknown protein
A_96_P123777	Solyc04g011380.2.1	2.03956	Binding protein
A_96_P220694	Solyc01g087210.2.1	2.0391	Cellulose synthase
A_96_P234664	Solyc04g076870.2.1	2.03879	Glutamyl-tRNA reductase chloroplastic
A_96_P025731	Solyc07g017780.2.1	2.0384	Plasma membrane atpase 4
A_96_P122932	Solyc07g054330.2.1	2.03799	F-box/kelch-repeat protein
A_96_P200564	Solyc06g069830.1.1	2.03715	Unknown protein
A_96_P043581	Solyc03g080050.2.1	2.0355	Stomatin-like protein mitochondrial
A_96_P047601	Solyc02g082340.2.1	2.03514	RNA polymerase I-specific transcription initiation factor RRN3
A_96_P220544	Solyc06g074110.2.1	2.03499	Transcription factor IHW
A_96_P244630	Solyc01g095300.2.1	2.0333	Glycosyl transferase family 1 protein
A_96_P236693	Solyc12g007100.1.1	2.03295	Ankyrin repeat and zinc finger domain-containing protein 1
A_96_P065951	Solyc01g104640.2.1	2.03156	Helicase
A_96_P118997	Solyc05g009350.2.1	2.03127	Zinc finger ccch domain-containing protein 65
A_96_P029421	Solyc03g114370.2.1	2.03059	ATP-dependent RNA helicase
A_96_P049726	Solyc01g096900.2.1	2.02998	DNA gyrase subunit A family protein
A_96_P039066	Solyc04g015750.2.1	2.02481	Magnesium-chelatase subunit chloroplastic
A_96_P165241	Solyc12g056940.1.1	2.02467	Acetyl- carboxylase 1-like
A_96_P083089	Solyc03g114790.2.1	2.02378	Isoaspartyl peptidase l-asparaginase 1
A_96_P099339	Solyc02g082220.2.1	2.02358	Protein transport protein sec24
A_96_P048801	Solyc07g032100.2.1	2.02327	Coatomer subunit alpha-1
A_96_P176839	Solyc03g115000.2.1	2.0231	Unknown protein
A_96_P229884	Solyc05g013940.2.1	2.02248	Actin-related protein 3
A_96_P061206	Solyc04g008290.2.1	2.0211	Microtubule-associated protein MAP65-1a
A_96_P232379	Solyc04g063360.2.1	2.02087	Cell division protease ftsH homolog
A_96_P066326	Solyc02g021360.2.1	2.02053	WD-40 repeat protein
A_96_P251722	Solyc06g076360.2.1	2.02018	Outer envelope membrane protein
A_96_P227974	Solyc04g081050.1.1	2.02007	TPR repeat-containing protein
A_96_P059556	Solyc04g015830.2.1	2.01866	Villin 2
A_96_P113997	Solyc08g016520.1.1	2.01845	Unknown protein
A_96_P163581	Solyc08g013940.2.1	2.01653	Serine/threonine protein kinase
A_96_P102099	Solyc04g049070.2.1	2.01436	Alpha glucosidase II
A_96_P241454	Solyc01g109010.2.1	2.01338	Unknown protein
A_96_P262132	Solyc10g009070.2.1	2.01278	dead-box atp-dependent rna helicase 29
A_96_P179964	Solyc01g101020.2.1	2.01274	FACT complex subunit SPT16
A_96_P060486	Solyc03g121610.2.1	2.01244	Receptor-like kinase
A_96_P203484	Solyc04g009640.2.1	2.00852	LRR receptor-like serine threonine-protein kinase at3g47570-like
A_96_P266512	Solyc11g005330.1.1	2.00836	Actin
A_96_P227284	Solyc07g053010.1.1	2.0078	NBS-LRR resistance isoform 1
A_96_P077834	Solyc07g065120.2.1	2.00678	Glycerophosphoryl diester phosphodiesterase 2
A_96_P139657	Solyc01g080810.2.1	2.00665	Isoleucyl-trna synthetase
A_96_P209564	Solyc02g083860.2.1	2.0066	Flavanone 3 beta-hydroxylase
A_96_P109837	Solyc03g111050.2.1	2.00643	Plastid RNA-binding protein
A_96_P091630	Solyc04g081570.2.1	2.00345	Chaperone protein htpG
A_96_P213169	Solyc04g063230.2.1	2.0031	Dehydration-responsive family protein
A_96_P021926	Solyc10g062120.1.1	2.00279	Unknown protein
A_96_P069041	Solyc05g006300.1.1	2.00242	Unknown protein
A_96_P167249	Solyc07g008340.2.1	2.00237	ABC transporter e family member 2
A_96_P170759	Solyc11g011540.1.1	2.00205	F-box family portein
A_96_P099469	Solyc01g017420.1.1	2.00147	RNA polymerase beta subunit
A_96_P102435	Solyc01g103740.2.1	2.0011	Ribosome biogenesis protein ERB1
A_96_P177029	Solyc05g018300.2.1	2.00085	Protein kinase A-like kinase

## Sheet: DOWN-regulated genes
Table S5. Differentially expressed genes (DEGs) of ProSys(1-178) transgenic plants identified by microarray analysis (Tomato array 4x44K, Agilent Technologies). ProbeName, Locus ITAG2.5, Fold change, Best Blast Hit Descriptor for down-regulated genes are reported.
ProbeName	Locus ITAG2.5	Fold change	Best Blast Hit Descriptor
A_96_P094694	Solyc01g081250.2.1	431.412	Glutathione-S-transferase
A_96_P094689	Solyc01g081250.2.1	143.798	Glutathione-S-transferase
A_96_P255932	Solyc11g045350.1.1	32.5502	Nodule inception protein
A_96_P065511	Solyc10g079680.1.1	29.8487	BHLH transcription factor-like
A_96_P031441	Solyc05g018180.2.1	19.9452	Unknow protein
A_96_P249962	Solyc00g102000.1.1	15.4663	Unknow protein
A_96_P220124	Solyc00g010550.1.1	14.181	Unknow protein
A_96_P192054	Solyc07g007250.2.1	14.1259	Metallocarboxypeptidase inhibitor
A_96_P187174	Solyc07g064810.2.1	13.5853	Imidazole glycerol phosphate synthase chloroplastic
A_96_P013536	Solyc09g042250.1.1	11.1824	Pentatricopeptide repeat-containing protein
A_96_P069186	Solyc09g037030.1.1	11.0358	Sister-chromatide cohesion protein 3
A_96_P088164	Solyc06g005210.1.1	10.8712	Cytochrome p450
A_96_P217804	Solyc11g027760.1.1	10.8116	Cytochrome p450
A_96_P184564	Solyc01g096560.1.1	10.6381	Subtilisin-like protease
A_96_P088084	Solyc01g058500.2.1	10.3116	Unknow protein
A_96_P194884	Solyc11g027710.1.1	10.3057	Unknow protein
A_96_P176629	Solyc11g027760.1.1	10.2682	Cytochrome p450
A_96_P152826	Solyc06g024210.1.1	10.1461	TO54-2
A_96_P224539	Solyc00g012440.1.1	10.146	TO54-2
A_96_P136772	Solyc06g024210.1.1	9.99659	TO54-2
A_96_P179674	Solyc06g051170.2.1	9.97608	RNA-dependent RNA polymerase family protein
A_96_P010533	Solyc06g062370.2.1	9.87027	Acid phosphatase
A_96_P038086	Solyc06g075990.2.1	9.79195	Glyoxalase/bleomycin resistance protein/dioxygenase
A_96_P226289	Solyc00g068970.2.1	9.48638	Cytochrome p450
A_96_P218929	Solyc00g102000.1.1	9.44349	Unknow protein
A_96_P195749	Solyc00g102000.1.1	9.32807	Unknow protein
A_96_P088154	Solyc06g024210.1.1	9.18261	TO54-2
A_96_P152756	Solyc00g012440.1.1	9.07715	TO54-2
A_96_P169544	Solyc01g058500.2.1	8.92791	Unknow protein
A_96_P022296	Solyc01g081270.2.1	8.30701	Glutathione S-transferase
A_96_P088114	Solyc10g049660.1.1	7.58051	Transposon protein Mutator sub-class
A_96_P094214	Solyc10g051390.1.1	7.55035	glycine-rich rna-binding
A_96_P120527	Solyc01g007520.2.1	7.44666	Photosystem II reaction center protein H
A_96_P232014	Solyc04g072570.2.1	7.36969	Somatic embryogenesis receptor kinase 1
A_96_P089594	Solyc12g062990.1.1	7.20611	Unknow protein
A_96_P238097	Solyc08g036520.2.1	7.13558	Unknow protein
A_96_P229109	Solyc10g006590.1.1	7.08511	POT family domain containing protein expressed
A_96_P228414	Solyc12g017630.1.1	7.00093	Nucleolar essential protein 1
A_96_P017291	Solyc04g025400.2.1	6.98802	Lipid phosphate phosphatase 4
A_96_P197839	Solyc03g005540.1.1	6.87398	Mutator-like transposase
A_96_P226609	Solyc12g017800.1.1	6.66206	Late blight resistance protein
A_96_P013541	Solyc09g091110.2.1	6.62394	Unknow protein
A_96_P182179	Solyc03g007570.2.1	6.43197	Magnesium and cobalt efflux protein corC
A_96_P040771	Solyc03g094080.2.1	6.37305	Polyadenylate-binding protein family protein
A_96_P127927	Solyc02g063220.2.1	6.36832	Mannose-6-phosphate isomerase 1
A_96_P093059	Solyc09g084470.2.1	6.28154	Proteinase inhibitor I
A_96_P226379	Solyc01g067100.2.1	6.22427	Cullin-1
A_96_P038276	Solyc04g025040.1.1	6.09965	Unknow protein
A_96_P088479	Solyc01g007690.2.1	5.8703	Unknow protein
A_96_P056646	Solyc08g077330.2.1	5.73158	Expansin
A_96_P179059	Solyc08g082250.2.1	5.67767	Endoglucanase 6
A_96_P193924	Solyc09g084470.2.1	5.61089	Proteinase inhibitor I
A_96_P255467	Solyc11g017440.1.1	5.52333	Gibberellin-regulated protein 9
A_96_P000336	Solyc09g005940.2.1	5.51392	Fatty acyl coA reductase
A_96_P076029	Solyc01g094010.2.1	5.49535	Carboxylesterase 8
A_96_P229949	Solyc01g111960.2.1	5.26056	GDSL esterase/lipase
A_96_P072904	Solyc09g097770.2.1	5.20429	Cell wall protein
A_96_P247367	Solyc07g041560.1.1	5.12792	Unknow protein
A_96_P017901	Solyc01g104860.2.1	5.06356	Peroxidase 43
A_96_P052606	Solyc06g007580.1.1	5.03364	Sulfate thiosulfate import atp-binding protein
A_96_P067841	Solyc03g123540.2.1	4.9075	class II heat shock protein
A_96_P198519	Solyc05g008850.2.1	4.8636	Auxin responsive protein
A_96_P146326	Solyc10g055820.1.1	4.82099	Chitinase
A_96_P223779	Solyc07g063420.2.1	4.82098	NAC domain transcription factor
A_96_P201779	Solyc08g065230.1.1	4.81507	Enhanced disease resistance 1
A_96_P085904	Solyc01g094810.2.1	4.75181	Ubiquitin-conjugating enzyme
A_96_P041821	Solyc06g053260.1.1	4.74146	Auxin-responsive family protein
A_96_P192834	Solyc04g025280.2.1	4.72086	Enhanced disease resistance 2
A_96_P013551	Solyc09g091110.2.1	4.66623	Unknow protein
A_96_P226844	Solyc06g010030.2.1	4.56197	MLO-like protein 6
A_96_P139622	Solyc08g005300.1.1	4.50596	Chaperone protein DNAj 49
A_96_P086799	Solyc06g024270.1.1	4.47284	Unknow protein
A_96_P010266	Solyc01g099410.2.1	4.46545	Histone H2A
A_96_P224849	Solyc00g013150.1.1	4.44699	Unknow protein
A_96_P220989	Solyc04g057880.2.1	4.42487	Histone-lysine N-methyltransferase
A_96_P260327	Solyc09g082810.2.1	4.40295	Unknow protein
A_96_P048616	Solyc08g016420.2.1	4.32494	Prefoldin subunit 6
A_96_P184919	Solyc02g094060.2.1	4.2496	Chloride channel protein clc-b
A_96_P142796	Solyc11g045430.1.1	4.23227	Unknow protein
A_96_P138182	Solyc09g097770.2.1	4.17313	Cell wall protein
A_96_P192049	Solyc12g100310.1.1	4.11433	Casein kinase
A_96_P070919	Solyc08g006130.1.1	4.09918	Unknow protein
A_96_P233494	Solyc01g094140.2.1	4.0942	Cytochrome P450
A_96_P171069	Solyc06g007970.2.1	4.05297	Male sterility 5 family protein
A_96_P226939	Solyc11g062220.1.1	4.0487	Novel protein containing a PHD-finger domain
A_96_P053161	Solyc09g030500.1.1	4.02483	Pol polyprotein
A_96_P073694	Solyc10g044550.1.1	4.00453	ATP synthase subunit c chloroplastic
A_96_P035146	Solyc04g050840.1.1	3.9765	Ycf2
A_96_P066096	Solyc02g077770.2.1	3.96144	Unknow protein
A_96_P229169	Solyc09g006010.2.1	3.93706	Pathogenesis related protein PR-1
A_96_P239812	Solyc01g081320.2.1	3.90354	Pentatricopeptide repeat-containing protein
A_96_P166274	Solyc08g083130.2.1	3.88167	Homeobox-leucine zipper protein
A_96_P226114	Solyc01g109800.2.1	3.85797	Unknow protein
A_96_P075974	Solyc10g055810.1.1	3.84855	Endochitinase
A_96_P260362	Solyc02g011760.1.1	3.78274	Photosystem I subunit VII
A_96_P001341	Solyc05g052760.2.1	3.78227	Phosphoinositide phospholipase c 2
A_96_P087624	Solyc09g006010.2.1	3.77222	Pathogenesis related protein PR-1
A_96_P010901	Solyc09g084450.2.1	3.7435	Proteinase Inhibitor I
A_96_P069884	Solyc01g007310.2.1	3.74117	NADH-plastoquinone oxidoreductase subunit 3
A_96_P107474	Solyc05g009050.2.1	3.68907	Receptor-like protein kinase
A_96_P191249	Solyc10g055810.1.1	3.68605	Endochitinase
A_96_P120287	Solyc10g005880.2.1	3.65733	Uridine kinase
A_96_P207909	Solyc08g074680.2.1	3.64417	Chloroplast polyphenol oxidase
A_96_P211504	Solyc02g088500.1.1	3.59962	C-glucosyltransferase
A_96_P206529	Solyc06g083420.1.1	3.58165	Chromatin modification-related protein eaf1
A_96_P246997	Solyc06g060370.2.1	3.58157	UDP-galactose transporter 1
A_96_P249927	Solyc01g111180.2.1	3.55983	Unknow protein
A_96_P135352	Solyc09g097770.2.1	3.51855	Cell wall protein
A_96_P087194	Solyc09g097770.2.1	3.48613	Cell wall protein
A_96_P086699	Solyc04g082200.2.1	3.48497	Dehydrin
A_96_P211914	Solyc05g008780.2.1	3.48253	Proton pump interactor 1
A_96_P252017	Solyc06g060010.2.1	3.47094	Alpha-humulene/(-)-(E)-beta-caryophyllene synthase
A_96_P059461	Solyc01g079810.2.1	3.46621	E3 ubiquitin-protein ligase rhf1a
A_96_P216984	Solyc04g064710.2.1	3.44951	Alcohol dehydrogenase 1
A_96_P190874	Solyc11g011210.1.1	3.44789	Gibberellin regulated protein
A_96_P112012	Solyc06g007580.1.1	3.43788	Sulfate thiosulfate import atp-binding protein
A_96_P197359	Solyc01g034160.1.1	3.42418	Pol polyprotein
A_96_P014141	Solyc09g008730.2.1	3.40547	GTP-binding protein
A_96_P076884	Solyc01g106630.2.1	3.40154	Unknow protein
A_96_P052466	Solyc10g080610.1.1	3.39742	Kelch-like protein 14
A_96_P056426	Solyc01g105680.2.1	3.38403	Phototropic-responsive NPH3 family protein
A_96_P025371	Solyc01g007330.2.1	3.37548	Ribulose bisphosphate carboxylase large chain
A_96_P216819	Solyc07g007150.1.1	3.36652	Unknow protein
A_96_P198979	Solyc03g007130.2.1	3.36386	Microtubule-associated protein MAP65-1a
A_96_P247197	Solyc09g008340.2.1	3.36292	Unknow protein
A_96_P135602	Solyc09g097770.2.1	3.35744	Cell wall protein
A_96_P127167	Solyc06g069400.2.1	3.34819	N(4)-(Beta-N-acetylglucosaminyl)-L-asparaginase
A_96_P133922	Solyc01g110800.2.1	3.32913	Auxin-induced SAUR-like protein
A_96_P236588	Solyc05g009540.2.1	3.29989	Serine threonine-protein kinase
A_96_P018051	Solyc08g078530.2.1	3.24951	Agenet domain containing protein expressed
A_96_P086029	Solyc09g098510.2.1	3.24714	Unknow protein
A_96_P171944	Solyc03g118820.2.1	3.24574	Ras-related protein Rab-25
A_96_P220884	Solyc03g025530.2.1	3.24342	S-layer domain protein
A_96_P084304	Solyc05g009710.2.1	3.24285	Mediator of RNA polymerase II transcription subunit 25
A_96_P251942	Solyc04g040180.2.1	3.21125	S-adenosylmethionine-dependent methyltransferase
A_96_P127342	Solyc02g071100.2.1	3.21065	Purine permease 10
A_96_P088559	Solyc09g010800.2.1	3.20904	Metallothionein-like protein
A_96_P099494	Solyc02g077880.2.1	3.20654	Auxin-repressed protein
A_96_P088089	Solyc05g053070.2.1	3.20113	Unknow protein
A_96_P041946	Solyc01g008940.2.1	3.19575	Anther protein
A_96_P261532	Solyc09g050110.1.1	3.19563	Unknow protein
A_96_P052381	Solyc08g067510.1.1	3.19522	Non-specific lipid-transfer protein
A_96_P037491	Solyc04g081530.1.1	3.19484	Chaperone protein dnaJ 11
A_96_P054411	Solyc05g006220.2.1	3.19078	IAA-amino acid hydrolase
A_96_P145621	Solyc01g105070.2.1	3.18916	Peroxidase
A_96_P205304	Solyc08g005680.2.1	3.18864	cis-prenyltransferase
A_96_P247557	Solyc05g054260.2.1	3.18667	Kinesin 13a
A_96_P222509	Solyc09g007320.2.1	3.17879	Pentatricopeptide repeat-containing protein chloroplastic
A_96_P134257	Solyc07g006410.1.1	3.17323	Unknow protein
A_96_P096059	Solyc03g052990.2.1	3.16679	Metal tolerance protein 4
A_96_P145311	Solyc00g174340.1.1	3.15969	Pathogenesis-related protein 1b
A_96_P224394	Solyc10g055810.1.1	3.15265	Endochitinase
A_96_P145481	Solyc09g066010.2.1	3.14419	WRKY transcription factor 25
A_96_P063791	Solyc01g011090.2.1	3.14312	Phospholipid-transporting ATPase
A_96_P170169	Solyc06g069040.2.1	3.13897	Glutathione S-transferase
A_96_P084919	Solyc12g098700.1.1	3.11448	ATP dependent RNA helicase
A_96_P011656	Solyc09g066010.2.1	3.1075	WRKY transcription factor 25
A_96_P127852	Solyc07g054930.2.1	3.08031	Flavonol synthase flavanone 3-hydroxylase
A_96_P246722	Solyc07g065080.2.1	3.07906	Fimbrin-1
A_96_P086559	Solyc06g035450.2.1	3.07795	ATP-dependent RNA helicase
A_96_P191909	Solyc06g073320.2.1	3.07446	GDP-L-galactose phosphorylase 1
A_96_P151566	Solyc03g116670.2.1	3.07445	TPR domain protein
A_96_P185139	Solyc03g045050.2.1	3.06185	Nuclear matrix constituent protein 1
A_96_P246285	Solyc04g072520.1.1	3.05574	Mitochondrial transcription termination factor family protein
A_96_P107304	Solyc02g079590.2.1	3.05552	Serine/threonine kinase receptor
A_96_P017751	Solyc10g005730.2.1	3.04003	WD-40 repeat family protein
A_96_P106199	Solyc01g095730.2.1	3.03928	Unknow protein
A_96_P156561	Solyc08g080650.1.1	3.03366	Osmotin
A_96_P032436	Solyc10g017930.1.1	3.032	Unknow protein
A_96_P110642	Solyc02g082460.2.1	3.00843	Exoribonuclease 2
A_96_P150736	Solyc01g005470.2.1	3.00796	Cell number regulator 10
A_96_P254522	Solyc02g078480.2.1	2.99974	CBS domain containing protein
A_96_P146751	Solyc04g077990.2.1	2.99729	LOB domain protein 38
A_96_P213774	Solyc07g062730.1.1	2.99672	Protein iws1 homolog
A_96_P043216	Solyc12g096340.1.1	2.9937	UDP-sugar transporter-like protein
A_96_P056891	Solyc07g062160.2.1	2.98438	Zinc finger protein CONSTANS-LIKE 1
A_96_P138207	Solyc02g077880.2.1	2.97691	Auxin-repressed protein
A_96_P020146	Solyc06g069400.2.1	2.97548	L-asparaginase
A_96_P077014	Solyc10g083650.1.1	2.9677	Peroxiredoxin ahpC/TSA family
A_96_P033266	Solyc02g077880.2.1	2.96343	Auxin-repressed protein
A_96_P116457	Solyc07g052770.2.1	2.95207	TMV resistance protein
A_96_P233804	Solyc02g092650.2.1	2.94849	Unknow protein
A_96_P139132	Solyc04g081810.2.1	2.93815	Subtilisin protease
A_96_P188969	Solyc09g098510.2.1	2.93349	Unknow protein
A_96_P091149	Solyc03g116890.2.1	2.93183	WRKY transcription factor 2
A_96_P198744	Solyc06g069420.2.1	2.92226	Universal stress protein family protein
A_96_P158146	Solyc08g082820.2.1	2.91467	Heat shock protein
A_96_P192519	Solyc01g111600.2.1	2.90991	Metal ion binding protein
A_96_P040081	Solyc07g056260.2.1	2.90712	Callose synthase 7
A_96_P183779	Solyc04g058100.2.1	2.90232	Metallothionein-like protein type 2
A_96_P042196	Solyc01g107400.2.1	2.8951	Indole-3-acetic acid-amido synthetase GH3.8
A_96_P034061	Solyc04g040210.2.1	2.87921	Cysteine-rich and transmembrane domain-containing protein a
A_96_P236773	Solyc06g010200.2.1	2.87599	Chromodomain helicase DNA-binding protein 4
A_96_P189009	Solyc01g008030.2.1	2.87202	Unknow protein
A_96_P153422	Solyc01g106630.2.1	2.86915	Unknow protein
A_96_P134312	Solyc07g007350.1.1	2.86628	Unknow protein
A_96_P098689	Solyc10g051380.1.1	2.85278	Glycine-rich RNA-binding protein
A_96_P021106	Solyc01g109180.2.1	2.84845	Long-chain-fatty-acid-CoA ligase
A_96_P117727	Solyc05g046290.2.1	2.84623	Xyloglucan endotransglucosylase/hydrolase 2
A_96_P065286	Solyc09g083220.2.1	2.84371	BHLH transcription factor
A_96_P191499	Solyc11g065140.1.1	2.8424	Chromodomain helicase DNA binding protein
A_96_P250312	Solyc01g007430.2.1	2.83172	Cytochrome b6-f complex subunit 5
A_96_P029156	Solyc08g067160.2.1	2.83157	Acyl-protein thioesterase 2
A_96_P038456	Solyc01g103980.2.1	2.8293	RING finger protein 170
A_96_P022566	Solyc03g117590.2.1	2.82906	Chaperone protein dnaj chloroplastic
A_96_P223894	Solyc12g045030.1.1	2.82544	Xylulose reductase
A_96_P138567	Solyc10g007900.2.1	2.82143	Cytochrome p450
A_96_P150161	Solyc12g010030.1.1	2.81532	Leucine aminopeptidase
A_96_P238122	Solyc07g005230.2.1	2.81101	Unknow protein
A_96_P096504	Solyc04g009240.1.1	2.80571	Late blight resistance protein
A_96_P056971	Solyc02g083320.2.1	2.80493	RNA-binding protein
A_96_P207039	Solyc08g075940.2.1	2.79813	DNA-directed RNA polymerase
A_96_P256487	Solyc02g093970.2.1	2.79485	Receptor like kinase
A_96_P089439	Solyc12g094620.1.1	2.79196	Catalase
A_96_P172279	Solyc01g109170.2.1	2.78465	Cold acclimation protein COR413
A_96_P144726	Solyc10g055800.1.1	2.78228	Chitinase
A_96_P185369	Solyc02g069580.2.1	2.77212	UDP-glucose 4-epimerase
A_96_P049626	Solyc04g010320.1.1	2.77136	Cytochrome p450
A_96_P119902	Solyc03g098480.1.1	2.77087	Unknow protein
A_96_P014445	Solyc06g076140.2.1	2.76257	Metallothionein-like protein type 2
A_96_P034946	Solyc01g005780.1.1	2.76222	LRR receptor-like serine/threonine-protein kinase
A_96_P129282	Solyc00g014790.2.1	2.75516	Unknow protein
A_96_P145806	Solyc04g082830.2.1	2.75383	Auxin efflux carrier family protein
A_96_P068496	Solyc03g121090.2.1	2.74167	Cold induced protein-like
A_96_P157886	Solyc03g117590.2.1	2.73788	Chaperone protein dnaj chloroplastic
A_96_P014036	Solyc12g006450.1.1	2.73535	Aminotransferase-like protein
A_96_P209449	Solyc12g096020.1.1	2.73273	Protein phosphatase 2C
A_96_P152881	Solyc07g005730.2.1	2.72188	Plasma membrane protein 3
A_96_P086279	Solyc09g066480.2.1	2.71944	Chromodomain-helicase-DNA-binding protein 2
A_96_P162611	Solyc08g078000.2.1	2.712	Vesicle-associated membrane family protein
A_96_P145301	Solyc10g055800.1.1	2.69159	Chitinase
A_96_P024376	Solyc05g008810.2.1	2.68922	Lipid phosphate phosphatase 3
A_96_P101289	Solyc01g007100.2.1	2.67092	Digalactosyldiacylglycerol synthase chloroplastic
A_96_P115067	Solyc04g076700.2.1	2.66759	MADS-box transcription factor-like protein
A_96_P170479	Solyc06g065850.2.1	2.6576	Flotillin domain protein
A_96_P183329	Solyc09g011470.2.1	2.64974	E3 ubiquitin-protein ligase rlim
A_96_P005626	Solyc07g056440.2.1	2.63261	Glutathione S-transferase
A_96_P114257	Solyc01g068630.2.1	2.63222	Haloacid dehalogenase-like hydrolase family protein
A_96_P093034	Solyc01g109170.2.1	2.62567	Cold acclimation protein COR413
A_96_P148036	Solyc06g084050.2.1	2.62417	Photosystem II reaction center W protein
A_96_P079084	Solyc01g109810.2.1	2.624	Unknow protein
A_96_P184239	Solyc02g082960.2.1	2.62188	Endochitinase
A_96_P149081	Solyc10g054010.1.1	2.61751	BZIP transcription factor
A_96_P081144	Solyc04g058100.2.1	2.61734	Metallothionein-like protein type 2
A_96_P083739	Solyc01g109810.2.1	2.61709	Unknow protein
A_96_P145926	Solyc12g055840.1.1	2.60469	Glucan endo-1 3-beta-glucosidase 7
A_96_P268343	Solyc10g085850.1.1	2.59954	TPSI1
A_96_P095559	Solyc02g070020.1.1	2.59211	UDP-glycosyltransferase
A_96_P190964	Solyc10g084060.1.1	2.59154	Cysteine-rich and transmembrane domain-containing protein
A_96_P203344	Solyc05g015710.2.1	2.59055	Unknow protein
A_96_P144496	Solyc06g035520.2.1	2.58887	Acetyl esterase
A_96_P098909	Solyc07g007260.2.1	2.5874	Metallocarboxypeptidase inhibitor
A_96_P127422	Solyc05g056220.2.1	2.58601	Methyltransferase-like protein 1
A_96_P000966	Solyc08g068770.1.1	2.58441	N-acetyltransferase
A_96_P072199	Solyc04g064530.1.1	2.56688	Unknow protein
A_96_P212754	Solyc10g081020.1.1	2.5667	Transcription elongation factor Spt6
A_96_P185204	Solyc01g090290.2.1	2.55766	COP9 signalosome complex subunit 7
A_96_P014386	Solyc12g040500.1.1	2.55178	Peroxisome biogenesis protein 3
A_96_P161086	Solyc11g066210.1.1	2.55148	Serine/threonine-protein phosphatase 7 long form homolog
A_96_P230219	Solyc01g108710.2.1	2.54957	Unknow protein
A_96_P089454	Solyc03g007530.2.1	2.54476	Multidrug resistance protein ABC transporter family
A_96_P000211	Solyc04g011390.1.1	2.53626	Histone H4
A_96_P155161	Solyc03g062650.2.1	2.53607	Unknow protein
A_96_P210784	Solyc06g053590.2.1	2.53295	Unknow protein
A_96_P182899	Solyc03g121570.2.1	2.53248	Transmembrane 9 superfamily member 4
A_96_P197064	Solyc11g012580.1.1	2.52311	Glucan endo-1 3-beta-glucosidase 3
A_96_P038226	Solyc10g086570.2.1	2.52294	Palmitoyltransferase PFA4
A_96_P126092	Solyc05g051020.2.1	2.52207	Dihydroflavonol 4-reductase family
A_96_P189939	Solyc06g050890.1.1	2.52028	Unknow protein
A_96_P225549	Solyc04g016370.2.1	2.51976	DNA ATP-dependent helicase
A_96_P059881	Solyc04g080360.2.1	2.51966	Dehydration-responsive family protein
A_96_P048981	Solyc08g006740.2.1	2.51897	Decarboxylase family protein
A_96_P001831	Solyc10g018350.1.1	2.51853	Vesicle-associated protein 1
A_96_P129522	Solyc11g005310.1.1	2.5133	Ring finger protein
A_96_P127922	Solyc02g065540.1.1	2.51182	Ring finger protein 5
A_96_P005921	Solyc04g082930.1.1	2.50744	Chlorophyll a-b binding protein
A_96_P008466	Solyc10g009150.2.1	2.50356	Organ-specific protein S2
A_96_P231219	Solyc08g067550.1.1	2.50275	Non-specific lipid-transfer protein
A_96_P185424	Solyc07g005470.2.1	2.49998	Reticulon-like protein B21
A_96_P064001	Solyc10g052530.1.1	2.49816	Auxin-responsive protein
A_96_P083259	Solyc01g016470.2.1	2.4946	60s acidic ribosomal protein p1
A_96_P006151	Solyc12g098150.1.1	2.49079	Voltage-gated potassium channel beta subunit
A_96_P051736	Solyc11g007360.1.1	2.48472	Unknow protein
A_96_P195944	Solyc12g007140.1.1	2.4803	Genomic DNA chromosome 3 P1 clone MSD24
A_96_P041156	Solyc02g093710.1.1	2.47717	Genomic DNA chromosome 3 TAC clone K1G2
A_96_P192354	Solyc01g097020.2.1	2.47595	Unknow protein
A_96_P256772	Solyc12g011310.1.1	2.47567	Glutathione S-transferase
A_96_P191579	Solyc12g056940.1.1	2.47426	Acetyl-CoA carboxylase
A_96_P115402	Solyc09g025230.2.1	2.4653	Phosphatidylinositol transfer protein SFH5
A_96_P188359	Solyc12g098540.1.1	2.45978	Ectonucleoside triphosphate diphosphohydrolase 6
A_96_P019451	Solyc01g098590.2.1	2.45972	Phosphoglycerate mutase family protein
A_96_P156601	Solyc07g005730.2.1	2.45576	Plasma membrane protein 3
A_96_P179849	Solyc02g091960.2.1	2.4502	Nuclear matrix constituent protein 2
A_96_P232994	Solyc10g084060.1.1	2.44828	Cysteine-rich and transmembrane domain-containing protein
A_96_P137327	Solyc02g086460.2.1	2.44779	Unknow protein
A_96_P193969	Solyc04g005160.1.1	2.44733	6-phosphogluconate decarboxylating 3
A_96_P257267	Solyc03g083620.1.1	2.44631	Unknow protein
A_96_P032776	Solyc07g007350.1.1	2.4438	Jp18
A_96_P210864	Solyc07g007390.2.1	2.43657	Unknow protein
A_96_P103619	Solyc12g027540.1.1	2.42731	Unknow protein
A_96_P122437	Solyc04g077360.2.1	2.4261	Serine/threonine-protein kinase receptor
A_96_P000166	Solyc08g080650.1.1	2.42584	Osmotin-like protein
A_96_P236018	Solyc07g043150.1.1	2.42557	UDP-glucosyltransferase
A_96_P042376	Solyc03g098740.1.1	2.41755	Kunitz trypsin inhibitor
A_96_P113682	Solyc12g014270.1.1	2.41412	Peptide-N4-(N-acetyl-beta-glucosaminyl)asparagine amidase A
A_96_P095774	Solyc07g005720.2.1	2.40299	Plasma membrane protein 3
A_96_P038186	Solyc08g080200.2.1	2.40039	Major facilitator superfamily domain-containing protein 8
A_96_P077654	Solyc09g089580.2.1	2.39662	1-aminocyclopropane-1-carboxylate oxidase
A_96_P154101	Solyc09g089580.2.1	2.39541	1-aminocyclopropane-1-carboxylate oxidase
A_96_P194924	Solyc10g050410.1.1	2.39507	Mutator-like transposase
A_96_P041386	Solyc03g082720.2.1	2.39504	Zinc binding protein
A_96_P010641	Solyc10g076870.1.1	2.39444	Nucleolin 2
A_96_P248677	Solyc08g006750.2.1	2.39365	Histidine decarboxylase
A_96_P259367	Solyc02g065300.1.1	2.39341	Leucyl-tRNA synthetase
A_96_P052896	Solyc02g083350.2.1	2.38309	DNA-directed RNA polymerase
A_96_P223179	Solyc10g078600.1.1	2.38255	Myrosinase-binding protein
A_96_P045736	Solyc07g064610.2.1	2.37937	Calcium-dependent protein kinase 2
A_96_P052336	Solyc11g010620.1.1	2.37899	bHLH family protein
A_96_P103474	Solyc12g096710.1.1	2.37893	Receptor-like protein kinase
A_96_P032251	Solyc11g065940.1.1	2.37829	Epsin 2-like protein
A_96_P098029	Solyc01g105370.2.1	2.37157	Enoyl-(Acyl-carrier-protein) reductase II
A_96_P014676	Solyc01g079420.2.1	2.37153	Cytochrome c oxidase subunit VC family protein
A_96_P028821	Solyc04g007830.2.1	2.37123	Major latex-like protein
A_96_P082754	Solyc01g005550.2.1	2.36773	Carboxyl-terminal peptidase
A_96_P060181	Solyc07g008400.1.1	2.36611	Pto-like Serine/threonine kinase protein
A_96_P073584	Solyc06g069520.2.1	2.36605	Protein asterix
A_96_P180134	Solyc09g010120.2.1	2.36162	Unknow protein
A_96_P136827	Solyc01g005040.2.1	2.35841	casp-like protein
A_96_P064696	Solyc09g090900.2.1	2.35424	3-isopropylmalate dehydratase large subunit
A_96_P107139	Solyc07g017880.2.1	2.34538	Peroxidase
A_96_P160271	Solyc08g006740.2.1	2.34464	Decarboxylase family protein
A_96_P151071	Solyc07g008080.2.1	2.34342	WD repeat-containing protein 11
A_96_P129517	Solyc01g091040.2.1	2.34074	Cysteine-rich repeat secretory protein 15
A_96_P088464	Solyc09g089960.1.1	2.33988	Unknow protein
A_96_P245710	Solyc01g068160.2.1	2.33888	Cysteine desulfurase like
A_96_P142911	Solyc01g065620.1.1	2.33854	NADH-plastoquinone oxidoreductase subunit 4
A_96_P022411	Solyc00g201160.2.1	2.33205	Receptor protein kinase
A_96_P154871	Solyc09g089580.2.1	2.33128	1-aminocyclopropane-1-carboxylate oxidase
A_96_P045466	Solyc12g019690.1.1	2.32849	Aquaporin
A_96_P008991	Solyc05g055310.2.1	2.32771	Copper chaperone
A_96_P258807	Solyc01g106230.2.1	2.3247	Unknow protein
A_96_P035271	Solyc03g058340.2.1	2.32209	Unknow protein
A_96_P152221	Solyc06g069520.2.1	2.32104	Protein asterix
A_96_P124682	Solyc06g007890.2.1	2.32065	Gibberellin-regulated protein
A_96_P007276	Solyc05g054340.2.1	2.31716	Late blight resistance protein
A_96_P190579	Solyc06g076140.2.1	2.30931	Metallothionein-like protein type 2
A_96_P199339	Solyc11g051060.1.1	2.30812	GDSL esterase/lipase 2
A_96_P078534	Solyc12g099430.1.1	2.30757	Epoxide hydrolase 1
A_96_P178029	Solyc06g076140.2.1	2.30667	Metallothionein-like protein type 2
A_96_P128672	Solyc01g097270.2.1	2.30484	Chitinase
A_96_P099254	Solyc10g084250.1.1	2.30378	Receptor-like kinase
A_96_P156766	Solyc08g068690.1.1	2.30336	N-acetyltransferase
A_96_P189439	Solyc10g076720.1.1	2.30335	Unknow protein
A_96_P142332	Solyc07g041680.1.1	2.29897	Hypothetical chloroplast RF1
A_96_P175454	Solyc05g043320.1.1	2.29846	GDSL esterase/lipase
A_96_P188084	Solyc06g069520.2.1	2.29679	Protein asterix
A_96_P151931	Solyc09g064740.2.1	2.29502	RNA exonuclease 4
A_96_P241104	Solyc01g007720.2.1	2.29281	Hypothetical chloroplast RF68
A_96_P044321	Solyc09g075670.1.1	2.29273	Gibberellin receptor GID1L2
A_96_P016796	Solyc04g074740.2.1	2.29074	Blue copper-like protein
A_96_P076824	Solyc09g098300.2.1	2.28798	Cystm1 family protein
A_96_P014651	Solyc06g065370.2.1	2.28712	Subtilisin
A_96_P119097	Solyc01g080910.2.1	2.28635	Polyadenylate-binding protein
A_96_P145376	Solyc08g068690.1.1	2.28562	N-acetyltransferase
A_96_P151251	Solyc06g076140.2.1	2.2854	Metallothionein-like protein type 2
A_96_P143681	Solyc01g106630.2.1	2.28325	Unknow protein
A_96_P031826	Solyc05g006390.1.1	2.28217	Unknow protein
A_96_P249247	Solyc08g078530.2.1	2.27997	Unknow protein
A_96_P199829	Solyc11g021210.1.1	2.27914	Cytochrome c heme attachment protein
A_96_P222429	Solyc04g077340.2.1	2.27794	Serine/threonine-protein kinase receptor
A_96_P233664	Solyc10g006710.2.1	2.27714	Serine/threonine-protein kinase receptor
A_96_P253012	Solyc05g051070.2.1	2.27667	Pre-mRNA-splicing factor ISY1
A_96_P058916	Solyc04g047720.2.1	2.276	ER membrane protein complex subunit 10
A_96_P200414	Solyc11g005980.1.1	2.26861	Callose synthase 5
A_96_P000936	Solyc01g097270.2.1	2.26357	Chitinase
A_96_P227444	Solyc10g050220.1.1	2.25937	Unknow protein
A_96_P260157	Solyc03g118170.2.1	2.25593	Glycyl-tRNA synthetase
A_96_P156621	Solyc02g088250.2.1	2.25484	Xenotropic and polytropic retrovirus receptor
A_96_P148151	Solyc02g085950.2.1	2.25085	Ribulose bisphosphate carboxylase
A_96_P063236	Solyc03g120420.2.1	2.24813	Unknow protein
A_96_P003176	Solyc12g056580.1.1	2.24778	Cellulose synthase a catalytic subunit 2
A_96_P086739	Solyc08g074630.1.1	2.2474	Polyphenol oxidase
A_96_P142417	Solyc06g071290.2.1	2.246	Betaine aldehyde dehydrogenase
A_96_P116522	Solyc01g108100.2.1	2.24486	Unknow protein
A_96_P086269	Solyc04g009920.2.1	2.23518	Glycogenin-like protein
A_96_P092959	Solyc09g007270.2.1	2.23132	Ascorbate peroxidase
A_96_P076344	Solyc07g005720.2.1	2.23048	Plasma membrane protein 3
A_96_P016311	Solyc11g073200.1.1	2.22949	Legumin 11S-globulin
A_96_P081054	Solyc09g011190.1.1	2.22782	Unknow protein
A_96_P223534	Solyc01g094810.2.1	2.22362	Ubiquitin-conjugating enzyme
A_96_P212274	Solyc02g081460.2.1	2.22331	Gamma-tubulin complex component 2
A_96_P042851	Solyc03g115930.1.1	2.21963	Calmodulin-like protein
A_96_P095404	Solyc09g098300.2.1	2.21939	Cystm1 family protein
A_96_P229604	Solyc07g061890.1.1	2.21782	Unknow protein
A_96_P240884	Solyc05g007940.2.1	2.21735	Ribonuclease T2
A_96_P154366	Solyc09g089580.2.1	2.21705	1-aminocyclopropane-1-carboxylate oxidase
A_96_P225749	Solyc05g054890.2.1	2.21691	ABC transporter g family member 6
A_96_P149126	Solyc02g085950.2.1	2.2163	Ribulose bisphosphate carboxylase
A_96_P164161	Solyc08g013850.1.1	2.21298	Pentatricopeptide repeat-containing protein
A_96_P201035	Solyc08g080640.1.1	2.2128	Osmotin-like protein
A_96_P222374	Solyc07g006820.2.1	2.21256	Transcription initiation factor TFIID subunit 1
A_96_P098309	Solyc01g094810.2.1	2.21009	Ubiquitin-conjugating enzyme
A_96_P216179	Solyc07g042450.2.1	2.20979	Unknow protein
A_96_P115907	Solyc03g082510.1.1	2.20886	Auxin-responsive family protein
A_96_P258392	Solyc09g083390.1.1	2.20739	Unknow protein
A_96_P209734	Solyc09g089580.2.1	2.20726	1-aminocyclopropane-1-carboxylate oxidase
A_96_P152796	Solyc06g007960.2.1	2.2037	Caffeic acid 3-O-methyltransferase
A_96_P121212	Solyc01g088700.2.1	2.20028	eukaryotic translation initiation factor 4g
A_96_P071044	Solyc04g025560.2.1	2.19941	ADP-ribosylation factor
A_96_P161781	Solyc11g042930.1.1	2.19899	SKP1
A_96_P184589	Solyc09g098230.2.1	2.19897	ATP-dependent DNA helicase 2
A_96_P071559	Solyc03g104790.1.1	2.19847	Cyclin-dependent protein kinase-like protein
A_96_P077619	Solyc01g106630.2.1	2.19768	Unknow protein
A_96_P256357	Solyc04g082910.1.1	2.1972	Unknow protein
A_96_P244280	Solyc03g113240.2.1	2.19616	Unknow protein
A_96_P109747	Solyc04g078890.2.1	2.196	Coenzyme Q-binding protein
A_96_P124737	Solyc01g095490.2.1	2.19445	Ubiquitin-conjugating enzyme E2 28
A_96_P089159	Solyc09g089580.2.1	2.19383	1-aminocyclopropane-1-carboxylate oxidase
A_96_P087229	Solyc02g085950.2.1	2.18829	Ribulose bisphosphate carboxylase
A_96_P021711	Solyc04g005070.2.1	2.18807	Peptide transporter
A_96_P087439	Solyc02g085950.2.1	2.18802	Ribulose bisphosphate carboxylase
A_96_P178829	Solyc04g009990.2.1	2.18708	Lysine-specific demethylase 5A
A_96_P220809	Solyc07g047850.2.1	2.18476	Chlorophyll a-b binding protein chloroplastic
A_96_P085974	Solyc06g062580.2.1	2.18403	Beta-galactosidase
A_96_P148421	Solyc07g064150.2.1	2.18159	Translation initiation factor SUI1
A_96_P224714	Solyc09g016950.2.1	2.17865	Unknow protein
A_96_P215249	Solyc07g062470.2.1	2.17722	Light-dependent short hypocotyls 1
A_96_P031206	Solyc09g092640.2.1	2.1772	Cytochrome P450
A_96_P110657	Solyc09g014760.2.1	2.17654	Chlorophyll synthase
A_96_P233629	Solyc01g097270.2.1	2.17607	Chitinase
A_96_P251742	Solyc03g033340.2.1	2.17238	Probable protein phosphatase 2c
A_96_P076794	Solyc02g069450.2.1	2.17235	Photosystem I reaction center subunit III
A_96_P197969	Solyc11g065910.1.1	2.17213	Unknow protein
A_96_P255342	Solyc02g068590.2.1	2.17042	Potassium transporter 11
A_96_P012116	Solyc04g082030.1.1	2.1694	Ornithine decarboxylase
A_96_P191294	Solyc06g061070.2.1	2.1666	Glycine cleavage system H protein 1
A_96_P261782	Solyc01g109860.2.1	2.16526	Phosphatidylinositol/phosphatidylcholine transfer protein
A_96_P062696	Solyc09g090600.2.1	2.16162	Acid phosphatase 1
A_96_P147991	Solyc01g094810.2.1	2.16143	Ubiquitin-conjugating enzyme
A_96_P168994	Solyc02g091650.2.1	2.15935	Glycine-rich protein
A_96_P262102	Solyc05g051660.1.1	2.15887	Gibberellin receptor GID1L2
A_96_P185294	Solyc12g096570.1.1	2.1584	ARGOS
A_96_P097924	Solyc01g044240.2.1	2.1572	Unknow protein
A_96_P044806	Solyc12g009750.1.1	2.15708	LRR receptor-like serine/threonine-protein kinase
A_96_P228529	Solyc08g005570.2.1	2.15628	Protein root uvb sensitive chloroplastic
A_96_P207854	Solyc05g009050.2.1	2.15458	Receptor-like protein kinase
A_96_P081389	Solyc08g076890.2.1	2.153	Unknow protein
A_96_P056771	Solyc06g007670.2.1	2.153	60s ribosomal proteinLl5
A_96_P132012	Solyc02g082450.2.1	2.15128	Auxin efflux carrier family protein
A_96_P177999	Solyc01g110940.2.1	2.1495	Auxin-induced SAUR-like protein
A_96_P034641	Solyc09g090350.2.1	2.14805	Oxidoreductase
A_96_P089124	Solyc09g089580.2.1	2.14798	1-aminocyclopropane-1-carboxylate oxidase
A_96_P108307	Solyc03g026030.1.1	2.14503	Unknow protein
A_96_P257262	Solyc04g080010.2.1	2.14443	UDP-glucosyltransferase
A_96_P205914	Solyc02g071000.1.1	2.14312	Chlorophyll a-b binding protein
A_96_P233539	Solyc01g010020.2.1	2.1431	Calmodulin
A_96_P192129	Solyc10g080190.1.1	2.14117	Unknow protein
A_96_P253732	Solyc03g045020.2.1	2.14064	Aromatic L-amino acid decarboxylase
A_96_P051161	Solyc08g077110.2.1	2.13836	NAC domain protein
A_96_P021701	Solyc08g015650.2.1	2.13565	La-related protein 6b
A_96_P096274	Solyc03g093360.2.1	2.13169	Wound/stress protein
A_96_P020331	Solyc01g096530.2.1	2.13014	Trafficking protein particle complex subunit 3
A_96_P216724	Solyc06g073020.2.1	2.12983	Serine-type endopeptidase inhibitor
A_96_P000061	Solyc04g077500.2.1	2.12827	Unknow protein
A_96_P248802	Solyc07g041500.2.1	2.12697	Cytochrome P450
A_96_P003396	Solyc05g015630.2.1	2.12691	Nuclear transport factor 2
A_96_P144426	Solyc07g017880.2.1	2.11805	Peroxidase
A_96_P239977	Solyc07g008290.2.1	2.11798	Growth regulator like protein
A_96_P114742	Solyc06g072230.1.1	2.11386	Miraculin
A_96_P185524	Solyc03g007690.1.1	2.1128	ABC transporter G family member 8
A_96_P246130	Solyc07g007170.2.1	2.11157	Zinc finger family protein
A_96_P260722	Solyc02g065380.2.1	2.1107	Cold acclimation protein COR413-like
A_96_P020161	Solyc01g105310.2.1	2.11065	Metacaspase
A_96_P039446	Solyc12g096340.1.1	2.1089	UDP-sugar transporter-like protein
A_96_P243979	Solyc07g006540.2.1	2.10427	Chaperone protein ClpB
A_96_P237472	Solyc05g053760.2.1	2.10325	Chaperone protein dnaJ 20
A_96_P129992	Solyc09g082780.2.1	2.1021	Asparagine synthetase B
A_96_P087524	Solyc02g084840.2.1	2.09999	Dehydrin DHN1
A_96_P087594	Solyc07g006380.2.1	2.09965	Defensin-like protein
A_96_P261917	Solyc03g115900.2.1	2.09907	Chlorophyll a-b binding protein
A_96_P268063	Solyc07g056670.2.1	2.09802	Gibberellin 2-oxidase 2
A_96_P216394	Solyc09g089580.2.1	2.09372	1-aminocyclopropane-1-carboxylate oxidase
A_96_P068741	Solyc07g056670.2.1	2.09193	Gibberellin 2-oxidase 2
A_96_P178209	Solyc07g064690.1.1	2.08747	Unknow protein
A_96_P031861	Solyc06g068500.2.1	2.08677	Chaperone protein DnaJ 1
A_96_P111667	Solyc09g090020.2.1	2.08507	Germin-like protein 5
A_96_P065536	Solyc06g034160.2.1	2.08007	Autophagy-related protein 3
A_96_P108452	Solyc10g083480.1.1	2.07841	F-box family protein
A_96_P047031	Solyc10g018530.1.1	2.07814	DNA mismatch repair protein MutS
A_96_P178104	Solyc09g089580.2.1	2.07731	1-aminocyclopropane-1-carboxylate oxidase
A_96_P182234	Solyc05g053780.2.1	2.07508	RNA binding protein
A_96_P077359	Solyc00g171810.2.1	2.06762	ATP synthase subunit a
A_96_P197454	Solyc01g097270.2.1	2.06739	Chitinase
A_96_P141887	Solyc11g072980.1.1	2.06431	3-ketoacyl- synthase 3
A_96_P014976	Solyc11g056270.1.1	2.0631	Maturase
A_96_P150431	Solyc07g066150.1.1	2.06221	Photosystem I reaction center subunit V
A_96_P227299	Solyc02g090940.2.1	2.06053	Lipase
A_96_P251937	Solyc02g085950.2.1	2.05898	Ribulose bisphosphate carboxylase
A_96_P016546	Solyc06g074620.2.1	2.05737	Unknow protein
A_96_P128237	Solyc11g020010.1.1	2.05503	Mutator-like transposase
A_96_P250732	Solyc03g098240.2.1	2.05379	Glutamate decarboxylase
A_96_P069354	Solyc11g006200.1.1	2.05364	Homeobox transcription factor Hox7-like protein
A_96_P102954	Solyc01g007300.1.1	2.05223	NADH dehydrogenase subunit k
A_96_P056211	Solyc08g067390.2.1	2.05081	Blight-associated protein P12
A_96_P016586	Solyc11g012380.1.1	2.05025	Cysteine proteinase inhibitor 5
A_96_P038406	Solyc09g014350.2.1	2.04619	glycerol-3-phosphate 2-o-acyltransferase 6
A_96_P079319	Solyc03g098240.2.1	2.04274	Glutamate decarboxylase
A_96_P245365	Solyc05g014760.2.1	2.0414	Cell division protein kinase 10
A_96_P000926	Solyc09g089580.2.1	2.04047	1-aminocyclopropane-1-carboxylate oxidase
A_96_P107729	Solyc11g011880.1.1	2.0401	Cysteine-rich receptor protein kinase 2
A_96_P164341	Solyc05g012610.2.1	2.03993	Appr-1-p processing enzyme domain protein
A_96_P078009	Solyc03g098490.1.1	2.0392	Unknow protein
A_96_P194369	Solyc12g008560.1.1	2.0363	Unknow protein
A_96_P231089	Solyc08g081820.2.1	2.03334	Cation/H+ antiporter
A_96_P147771	Solyc06g071080.2.1	2.03235	Proton-dependent oligopeptide transport family protein
A_96_P135287	Solyc04g051850.2.1	2.03166	Unknow protein
A_96_P233834	Solyc10g055770.1.1	2.03106	Multidrug resistance protein 2
A_96_P223239	Solyc05g053760.2.1	2.02915	Chaperone protein dnaJ 20
A_96_P188904	Solyc06g084170.2.1	2.02779	Unknow protein
A_96_P097919	Solyc01g044240.2.1	2.02386	Unknow protein
A_96_P008646	Solyc08g078820.2.1	2.02243	Autophagy-related protein 8
A_96_P021111	Solyc06g007310.2.1	2.02161	Deoxyribonuclease tatD
A_96_P173944	Solyc09g082780.2.1	2.01924	Asparagine synthetase B
A_96_P165956	Solyc08g079250.2.1	2.01833	Lipid transfer protein
A_96_P078249	Solyc03g007470.2.1	2.01617	Ubiquitin-conjugating enzyme E2 10
A_96_P224669	Solyc10g006920.2.1	2.0156	CBS domain containing protein
A_96_P012426	Solyc02g032910.1.1	2.01545	Glycine rich protein
A_96_P164286	Solyc04g076060.2.1	2.01392	14-3-3 protein beta/alpha-B
A_96_P233164	Solyc12g009800.1.1	2.01214	Purple acid phosphatase 3
A_96_P048996	Solyc04g014730.2.1	2.00925	Fumarylacetoacetase
A_96_P031076	Solyc01g109810.2.1	2.0092	Unknow protein
A_96_P086424	Solyc01g005440.2.1	2.009	Jasmonate ZIM-domain protein 3
A_96_P175249	Solyc05g014470.2.1	2.00772	Glyceraldehyde 3-phosphate dehydrogenase
A_96_P040371	Solyc03g114800.1.1	2.00673	Flavonol sulfotransferase
A_96_P073614	Solyc01g099210.2.1	2.00452	Lipoxygenase
A_96_P057791	Solyc06g071780.2.1	2.00322	Protein DEHYDRATION-INDUCED 19 homolog 5
A_96_P107219	Solyc12g044930.1.1	2.00077	F-box protein PP2-B1
